# Supplementary material for: Incidence of lower limb amputation in people with and without diabetes: a nationwide 5-year cohort study in Japan
Source: HighWire-hosted journal article supplement (doi:10.1136/bmjopen-2020-048436), 2021-08-01
Supplement: bmjopen-2020-048436supp001_data_supplement.pdf [file bmjopen-2020-048436supp001_data_supplement.pdf]

**Supplementary Table S1** Diagnostic codes of diabetes.

| Diagnosis in Japanese    | Diagnosis in English                                                                | ICD-10 code | diagnosis code |
|--------------------------|-------------------------------------------------------------------------------------|-------------|----------------|
| 1 型糖尿病                   | Type 1 diabetes mellitus                                                            | E10         | 2500014        |
| 不安定型糖尿病                  | Brittle diabetes                                                                    | E10         | 2500027        |
| 緩徐進行 1 型糖尿病              | SPIDDM - [Slowly progressive insulin-dependent diabetes mellitus]                   | E10         | 8844022        |
| 1 型糖尿病性昏睡                | Type 1 diabetic coma                                                                | E100        | 8830030        |
| 1 型糖尿病・昏睡合併あり            | Type 1 diabetes mellitus with coma                                                  | E100        | 8841679        |
| 緩徐進行 1 型糖尿病・昏睡合併あり       | SPIDDM with coma - [Slowly progressive insulin-dependent diabetes mellitus]         | E100        | 8844026        |
| 1 型糖尿病性低血糖性昏睡            | Hypoglycemia in the context of type 1 diabetes mellitus                             | E100        | 8845065        |
| 1 型糖尿病性ケトアシドーシス          | Diabetic ketoacidosis in type 1 diabetes mellitus                                   | E101        | 8830028        |
| 1 型糖尿病・ケトアシドーシス合併あり      | Type 1 diabetes mellitus with ketoacidosis                                          | E101        | 8841680        |
| 緩徐進行 1 型糖尿病・ケトアシドーシス合併あり | SPIDDM with ketoacidosis - [Slowly progressive insulin-dependent diabetes mellitus] | E101        | 8844025        |
| 劇症 1 型糖尿病                | Fulminant type 1 diabetes mellitus                                                  | E101        | 8844045        |
| 1 型糖尿病性アシドーシス            | Diabetic ketoacidosis in type 1 diabetes mellitus                                   | E101        | 8845044        |
| 1 型糖尿病性アセトン血症            | Type 1 diabetic acetone hyperlipoproteinemia                                        | E101        | 8845045        |
| 1 型糖尿病性腎症                | Type 1 diabetic nephropathy                                                         | E102        | 8830031        |
| 1 型糖尿病・腎合併症あり            | Type 1 diabetes mellitus with diabetic nephropathy                                  | E102        | 8841681        |
| 1 型糖尿病性腎症第 1 期           | Type 1 diabetic nephropathy phase 1                                                 | E102        | 8843983        |
| 1 型糖尿病性腎症第 2 期           | Type 1 diabetic nephropathy phase 2                                                 | E102        | 8843984        |
| 1 型糖尿病性腎症第 3 期           | Type 1 diabetic nephropathy phase 3                                                 | E102        | 8843985        |
| 1 型糖尿病性腎症第 3 期 A         | Type 1 diabetic nephropathy phase 3A                                                | E102        | 8843986        |
| 1 型糖尿病性腎症第 3 期 B         | Type 1 diabetic nephropathy phase 3B                                                | E102        | 8843987        |
| 1 型糖尿病性腎症第 4 期           | Type 1 diabetic nephropathy phase 4                                                 | E102        | 8843988        |
| 1 型糖尿病性腎症第 5 期           | Type 1 diabetic nephropathy phase 5                                                 | E102        | 8843989        |

|                       |                                                                                                   |      |         |
|-----------------------|---------------------------------------------------------------------------------------------------|------|---------|
| 緩徐進行 1 型糖尿病・腎合併症あり    | SPIDDM with nephropathy - [Slowly progressive insulin-dependent diabetes mellitus]                | E102 | 8844028 |
| 1 型糖尿病性腎硬化症           | Type 1 diabetic nephrosclerosis                                                                   | E102 | 8845058 |
| 1 型糖尿病性腎不全            | Type 1 diabetic kidney failure                                                                    | E102 | 8845059 |
| 1 型糖尿病性網膜症            | Type 1 diabetic retinopathy                                                                       | E103 | 8830033 |
| 1 型糖尿病・眼合併症あり         | Type 1 diabetes mellitus with eye complication                                                    | E103 | 8841682 |
| 1 型糖尿病性黄斑浮腫           | Type 1 diabetic macular edema                                                                     | E103 | 8843982 |
| 緩徐進行 1 型糖尿病・眼合併症あり    | SPIDDM with eye complication - [Slowly progressive insulin-dependent diabetes mellitus]           | E103 | 8844024 |
| 1 型糖尿病性白内障            | Type 1 diabetic cataracts                                                                         | E103 | 8844346 |
| 増殖性糖尿病性網膜症・1 型糖尿病     | Proliferative diabetic retinopathy, type 1 diabetes                                               | E103 | 8844536 |
| 1 型糖尿病黄斑症             | Type 1 diabetic macular disease                                                                   | E103 | 8845043 |
| 1 型糖尿病性眼筋麻痺           | Type 1 diabetic eye muscle paralysis                                                              | E103 | 8845049 |
| 1 型糖尿病性虹彩炎            | Type 1 diabetic iritis                                                                            | E103 | 8845053 |
| 1 型糖尿病性中心性網膜症         | Type 1 diabetic central retinopathy                                                               | E103 | 8845064 |
| 1 型糖尿病性ニューロパチー        | Type 1 diabetic neuropathy                                                                        | E104 | 8830032 |
| 1 型糖尿病・神経学的合併症あり      | Type 1 diabetes mellitus with neurological complications                                          | E104 | 8841683 |
| 緩徐進行 1 型糖尿病・神経学的合併症あり | SPIDDM with neurological complications - [Slowly progressive insulin-dependent diabetes mellitus] | E104 | 8844027 |
| 1 型糖尿病性筋萎縮症           | Type 1 diabetic muscular atrophy                                                                  | E104 | 8845050 |
| 1 型糖尿病性神経因性膀胱         | Type 1 diabetic neuropathic bladder                                                               | E104 | 8845055 |
| 1 型糖尿病性神経痛            | Type 1 diabetic neuralgia                                                                         | E104 | 8845056 |

|                       |                                                                                                             |      |         |
|-----------------------|-------------------------------------------------------------------------------------------------------------|------|---------|
| 1 型糖尿病性自律神経ニューロパチー    | Type 1 diabetic autonomic neuropathy                                                                        | E104 | 8845057 |
| 1 型糖尿病性多発ニューロパチー      | Type 1 diabetic polyneuropathy                                                                              | E104 | 8845062 |
| 1 型糖尿病性単ニューロパチー       | Type 1 diabetic mononeuropathy                                                                              | E104 | 8845063 |
| 1 型糖尿病性末梢神経障害         | Type 1 diabetic peripheral neuropathy                                                                       | E104 | 8845071 |
| 1 型糖尿病・末梢循環合併症あり      | Type 1 diabetes mellitus with peripheral circulation complications                                          | E105 | 8841684 |
| 1 型糖尿病性壊疽             | Type 1 diabetic gangrene                                                                                    | E105 | 8843105 |
| 緩徐進行 1 型糖尿病・末梢循環合併症あり | SPIDDM with peripheral circulation complications - [Slowly progressive insulin-dependent diabetes mellitus] | E105 | 8844031 |
| 1 型糖尿病性潰瘍             | Type 1 diabetic ulcer                                                                                       | E105 | 8845046 |
| 1 型糖尿病性血管障害           | Type 1 diabetic vascular disease                                                                            | E105 | 8845051 |
| 1 型糖尿病性動脈硬化症          | Type 1 diabetic atherosclerosis                                                                             | E105 | 8845066 |
| 1 型糖尿病性動脈閉塞症          | Type 1 diabetic arterial occlusion                                                                          | E105 | 8845067 |
| 1 型糖尿病性末梢血管症          | Type 1 diabetic peripheral vascular disease                                                                 | E105 | 8845069 |
| 1 型糖尿病性末梢血管障害         | Type 1 diabetic peripheral vascular disease                                                                 | E105 | 8845070 |
| 1 型糖尿病・関節合併症あり        | Type 1 diabetes mellitus with joint complications                                                           | E106 | 8841685 |
| 1 型糖尿病・糖尿病性合併症あり      | Type 1 diabetes mellitus with diabetic complications                                                        | E106 | 8841686 |
| 緩徐進行 1 型糖尿病・関節合併症あり   | SPIDDM with joint complications - [Slowly progressive insulin-dependent diabetes mellitus]                  | E106 | 8844023 |
| 1 型糖尿病性水疱             | Type 1 diabetic blister                                                                                     | E106 | 8844626 |
| 1 型糖尿病性浮腫性硬化症         | Type 1 diabetic edematous sclerosis                                                                         | E106 | 8844627 |
| 1 型糖尿病性肝障害            | Type 1 diabetic liver injury                                                                                | E106 | 8845047 |

|                         |                                                                                                        |      |         |
|-------------------------|--------------------------------------------------------------------------------------------------------|------|---------|
| 1 型糖尿病性関節症              | Type 1 diabetic arthropathy                                                                            | E106 | 8845048 |
| 1 型糖尿病性高コレステロール血症       | Type 1 diabetic hypercholesterolemia                                                                   | E106 | 8845052 |
| 1 型糖尿病性骨症               | Type 1 diabetic osteopathy                                                                             | E106 | 8845054 |
| 1 型糖尿病性精神障害             | Type 1 diabetic mental disorder                                                                        | E106 | 8845060 |
| 1 型糖尿病性そう痒症             | Type 1 diabetic pruritus                                                                               | E106 | 8845061 |
| 1 型糖尿病性皮膚障害             | Type 1 diabetic skin disorder                                                                          | E106 | 8845068 |
| 1 型糖尿病性胃腸症              | Type 1 diabetic gastroenteritis                                                                        | E106 | 8845842 |
| 1 型糖尿病・多発糖尿病性合併症あり      | Type 1 diabetes mellitus with multiple diabetic complications                                          | E107 | 8841687 |
| 緩徐進行 1 型糖尿病・多発糖尿病性合併症あり | SPIDDM with multiple diabetic complications - [Slowly progressive insulin-dependent diabetes mellitus] | E107 | 8844029 |
| 1 型糖尿病・糖尿病性合併症なし        | Type 1 diabetes mellitus without diabetic complications                                                | E109 | 8841688 |
| 緩徐進行 1 型糖尿病・糖尿病性合併症なし   | SPIDDM without diabetic complications - [Slowly progressive insulin-dependent diabetes mellitus]       | E109 | 8844030 |
| インスリン抵抗性糖尿病             | Insulin resistant diabetes mellitus                                                                    | E11  | 2500001 |
| 2 型糖尿病                  | Type 2 diabetes mellitus                                                                               | E11  | 2500015 |
| 安定型糖尿病                  | Stable diabetes mellitus                                                                               | E11  | 8830405 |
| 若年 2 型糖尿病               | Juvenile type 2 diabetes                                                                               | E11  | 8835244 |
| 2 型糖尿病性昏睡               | Type 2 diabetic coma                                                                                   | E110 | 8830041 |
| 2 型糖尿病・昏睡合併あり           | Type 2 diabetes mellitus with coma                                                                     | E110 | 8841689 |

|                    |                                                              |      |         |
|--------------------|--------------------------------------------------------------|------|---------|
| 2型糖尿病性低血糖性昏睡       | Hypoglycemic coma in the context of type 2 diabetes mellitus | E110 | 8845094 |
| 2型糖尿病性ケトアシドーシス     | Type 2 diabetic ketoacidosis                                 | E111 | 8830040 |
| 2型糖尿病・ケトアシドーシス合併あり | Type 2 diabetes mellitus with ketoacidosis                   | E111 | 8841690 |
| 2型糖尿病性アシドーシス       | Type 2 diabetic acidosis                                     | E111 | 8845073 |
| 2型糖尿病性アセトン血症       | Type 2 diabetic acetone hyperlipoproteinemia                 | E111 | 8845074 |
| 2型糖尿病性腎症           | Type 2 diabetic nephropathy                                  | E112 | 8830042 |
| 2型糖尿病・腎合併症あり       | Type 2 diabetes mellitus with diabetic nephropathy           | E112 | 8841691 |
| 2型糖尿病性腎症第1期        | Type 2 diabetic nephropathy phase 1                          | E112 | 8843991 |
| 2型糖尿病性腎症第2期        | Type 2 diabetic nephropathy phase 2                          | E112 | 8843992 |
| 2型糖尿病性腎症第3期        | Type 2 diabetic nephropathy phase 3                          | E112 | 8843993 |
| 2型糖尿病性腎症第3期A       | Type 2 diabetic nephropathy phase 3A                         | E112 | 8843994 |
| 2型糖尿病性腎症第3期B       | Type 2 diabetic nephropathy phase 3B                         | E112 | 8843995 |
| 2型糖尿病性腎症第4期        | Type 2 diabetic nephropathy phase 4                          | E112 | 8843996 |
| 2型糖尿病性腎症第5期        | Type 2 diabetic nephropathy phase 5                          | E112 | 8843997 |
| 2型糖尿病性腎硬化症         | Type 2 diabetic nephrosclerosis                              | E112 | 8845087 |
| 2型糖尿病性腎不全          | Type 2 diabetic kidney failure                               | E112 | 8845088 |
| 2型糖尿病性網膜症          | Type 2 diabetic retinopathy                                  | E113 | 8830045 |
| 2型糖尿病・眼合併症あり       | Type 2 diabetes mellitus with eye complications              | E113 | 8841692 |
| 2型糖尿病性黄斑浮腫         | Type 2 diabetic macular edema                                | E113 | 8843990 |
| 2型糖尿病性白内障          | Type 2 diabetic cataracts                                    | E113 | 8844347 |
| 増殖性糖尿病性網膜症・2型糖尿病   | Proliferative diabetic retinopathy, type 2 diabetes          | E113 | 8844537 |

|                   |                                                                    |      |         |
|-------------------|--------------------------------------------------------------------|------|---------|
| 2型糖尿病黄斑症          | Type 2 diabetic macular disease                                    | E113 | 8845072 |
| 2型糖尿病性眼筋麻痺        | Type 2 diabetic eye muscle paralysis                               | E113 | 8845078 |
| 2型糖尿病性虹彩炎         | Type 2 diabetic iritis                                             | E113 | 8845082 |
| 2型糖尿病性中心性網膜症      | Type 2 diabetic central retinopathy                                | E113 | 8845093 |
| 2型糖尿病性ニューロパチー     | Type 2 diabetic neuropathy                                         | E114 | 8830043 |
| 2型糖尿病性ミオパチー       | Type 2 diabetic myopathy                                           | E114 | 8830044 |
| 2型糖尿病・神経学的合併症あり   | Type 2 diabetes mellitus with neurological complications           | E114 | 8841693 |
| 2型糖尿病性筋萎縮症        | Type 2 diabetic muscular atrophy                                   | E114 | 8845079 |
| 2型糖尿病性神経因性膀胱      | Type 2 diabetic neuropathic bladder                                | E114 | 8845084 |
| 2型糖尿病性神経痛         | Type 2 diabetic neuralgia                                          | E114 | 8845085 |
| 2型糖尿病性自律神経ニューロパチー | Type 2 diabetic autonomic neuropathy                               | E114 | 8845086 |
| 2型糖尿病性多発ニューロパチー   | Type 2 diabetic polyneuropathy                                     | E114 | 8845091 |
| 2型糖尿病性単ニューロパチー    | Type 2 diabetic mononeuropathy                                     | E114 | 8845092 |
| 2型糖尿病性末梢神経障害      | Type 2 diabetic peripheral neuropathy                              | E114 | 8845100 |
| 2型糖尿病・末梢循環合併症あり   | Type 2 diabetes mellitus with peripheral circulation complications | E115 | 8841694 |
| 2型糖尿病性壊疽          | Type 2 diabetic gangrene                                           | E115 | 8843106 |
| 2型糖尿病性潰瘍          | Type 2 diabetic ulcer                                              | E115 | 8845075 |
| 2型糖尿病性血管障害        | Type 2 diabetic vascular disease                                   | E115 | 8845080 |
| 2型糖尿病性動脈硬化症       | Type 2 diabetic atherosclerosis                                    | E115 | 8845095 |
| 2型糖尿病性動脈閉塞症       | Type 2 diabetic arterial occlusion                                 | E115 | 8845096 |
| 2型糖尿病性末梢血管症       | Type 2 diabetic peripheral vascular disease                        | E115 | 8845098 |

|                   |                                                               |      |         |
|-------------------|---------------------------------------------------------------|------|---------|
| 2型糖尿病性末梢血管障害      | Type 2 diabetic peripheral vascular disease                   | E115 | 8845099 |
| 2型糖尿病・関節合併症あり     | Type 2 diabetes mellitus with joint complications             | E116 | 8841695 |
| 2型糖尿病・糖尿病性合併症あり   | Type 2 diabetes mellitus with diabetic complications          | E116 | 8841696 |
| 2型糖尿病性水疱          | Type 2 diabetic blister                                       | E116 | 8844628 |
| 2型糖尿病性浮腫性硬化症      | Type 2 diabetic edematous sclerosis                           | E116 | 8844629 |
| 2型糖尿病性肝障害         | Type 2 diabetic liver injury                                  | E116 | 8845076 |
| 2型糖尿病性関節症         | Type 2 diabetic arthropathy                                   | E116 | 8845077 |
| 2型糖尿病性高コレステロール血症  | Type 2 diabetic hypercholesterolemia                          | E116 | 8845081 |
| 2型糖尿病性骨症          | Type 2 diabetic osteopathy                                    | E116 | 8845083 |
| 2型糖尿病性精神障害        | Type 2 diabetic mental disorder                               | E116 | 8845089 |
| 2型糖尿病性そう痒症        | Type 2 diabetic pruritus                                      | E116 | 8845090 |
| 2型糖尿病性皮膚障害        | Type 2 diabetic skin disorder                                 | E116 | 8845097 |
| 2型糖尿病性胃腸症         | Type 2 diabetic gastroenteritis                               | E116 | 8848108 |
| 2型糖尿病・多発糖尿病性合併症あり | Type 2 diabetes mellitus with multiple diabetic complications | E117 | 8841697 |
| 2型糖尿病・糖尿病性合併症なし   | Type 2 diabetes mellitus without diabetic complications       | E119 | 8841698 |
| 栄養不良関連糖尿病         | Malnutrition-related diabetes mellitus                        | E12  | 2500037 |
| 膵性糖尿病             | Pancreatic diabetes mellitus                                  | E13  | 2500024 |
| ステロイド糖尿病          | Steroid diabetes mellitus                                     | E13  | 2509003 |
| 二次性糖尿病            | Secondary diabetes mellitus                                   | E13  | 2509004 |
| ウイルス性糖尿病          | Viral diabetes mellitus                                       | E13  | 8830756 |
| 薬剤性糖尿病            | Drug-induced diabetes mellitus                                | E13  | 8840710 |



|                       |                                                         |      |         |
|-----------------------|---------------------------------------------------------|------|---------|
| ウイルス性糖尿病・昏睡合併あり       | Viral diabetes mellitus with coma                       | E130 | 8843122 |
| 膵性糖尿病・昏睡合併あり          | Pancreatic diabetes mellitus with coma                  | E130 | 8843377 |
| ステロイド糖尿病・昏睡合併あり       | Steroid diabetes mellitus with coma                     | E130 | 8843390 |
| 二次性糖尿病・昏睡合併あり         | Secondary diabetes mellitus with coma                   | E130 | 8843450 |
| 薬剤性糖尿病・昏睡合併あり         | Drug-induced diabetes mellitus with coma                | E130 | 8843621 |
| ウイルス性糖尿病・ケトアシドーシス合併あり | Viral diabetes mellitus with ketoacidosis               | E131 | 8843121 |
| 膵性糖尿病・ケトアシドーシス合併あり    | Pancreatic diabetes mellitus with ketoacidosis          | E131 | 8843376 |
| ステロイド糖尿病・ケトアシドーシス合併あり | Steroid diabetes mellitus with ketoacidosis             | E131 | 8843389 |
| 二次性糖尿病・ケトアシドーシス合併あり   | Secondary diabetes mellitus with ketoacidosis           | E131 | 8843449 |
| 薬剤性糖尿病・ケトアシドーシス合併あり   | Drug-induced diabetes mellitus with ketoacidosis        | E131 | 8843620 |
| ウイルス性糖尿病・腎合併症あり       | Viral diabetes mellitus with renal complications        | E132 | 8843124 |
| 膵性糖尿病・腎合併症あり          | Pancreatic diabetes mellitus with renal complications   | E132 | 8843379 |
| ステロイド糖尿病・腎合併症あり       | Steroid diabetes mellitus with renal complications      | E132 | 8843392 |
| 二次性糖尿病・腎合併症あり         | Secondary diabetes mellitus with renal complications    | E132 | 8843452 |
| 薬剤性糖尿病・腎合併症あり         | Drug-induced diabetes mellitus with renal complications | E132 | 8843623 |
| ウイルス性糖尿病・眼合併症あり       | Viral diabetes mellitus with eye complications          | E133 | 8843120 |
| 膵性糖尿病・眼合併症あり          | Pancreatic diabetes mellitus with eye complications     | E133 | 8843375 |
| ステロイド糖尿病・眼合併症あり       | Steroid diabetes mellitus with eye complications        | E133 | 8843388 |

|                    |                                                                          |      |         |
|--------------------|--------------------------------------------------------------------------|------|---------|
| 二次性糖尿病・眼合併症あり      | Secondary diabetes mellitus with eye complications                       | E133 | 8843448 |
| 薬剤性糖尿病・眼合併症あり      | Drug-induced diabetes mellitus with eye complications                    | E133 | 8843619 |
| ウイルス性糖尿病・神経学的合併症あり | Viral diabetes mellitus with neurological complications                  | E134 | 8843123 |
| 膵性糖尿病・神経学的合併症あり    | Pancreatic diabetes mellitus with neurological complications             | E134 | 8843378 |
| ステロイド糖尿病・神経学的合併症あり | Steroid diabetes mellitus with neurological complications                | E134 | 8843391 |
| 二次性糖尿病・神経学的合併症あり   | Secondary diabetes mellitus with neurological complications              | E134 | 8843451 |
| 薬剤性糖尿病・神経学的合併症あり   | Drug-induced diabetes mellitus with neurological complications           | E134 | 8843622 |
| ウイルス性糖尿病・末梢循環合併症あり | Viral diabetes mellitus with peripheral circulatory complications        | E135 | 8843128 |
| 膵性糖尿病・末梢循環合併症あり    | Pancreatic diabetes mellitus with peripheral circulatory complications   | E135 | 8843383 |
| ステロイド糖尿病・末梢循環合併症あり | Steroid diabetes mellitus with peripheral circulatory complications      | E135 | 8843396 |
| 二次性糖尿病・末梢循環合併症あり   | Secondary diabetes mellitus with peripheral circulatory complications    | E135 | 8843456 |
| 薬剤性糖尿病・末梢循環合併症あり   | Drug-induced diabetes mellitus with peripheral circulatory complications | E135 | 8843627 |
| ウイルス性糖尿病・糖尿病性合併症あり | Viral diabetes mellitus with diabetic complications                      | E136 | 8843126 |

|                      |                                                                     |      |         |
|----------------------|---------------------------------------------------------------------|------|---------|
| 膵性糖尿病・糖尿病性合併症あり      | Pancreatic diabetes mellitus with diabetic complications            | E136 | 8843381 |
| ステロイド糖尿病・糖尿病性合併症あり   | Steroid diabetes mellitus with diabetic complications               | E136 | 8843394 |
| 二次性糖尿病・糖尿病性合併症あり     | Secondary diabetes mellitus with diabetic complications             | E136 | 8843454 |
| 薬剤性糖尿病・糖尿病性合併症あり     | Drug-induced diabetes mellitus with diabetic complications          | E136 | 8843625 |
| ウイルス性糖尿病・多発糖尿病性合併症あり | Viral diabetes mellitus with multiple diabetic complications        | E137 | 8843125 |
| 膵性糖尿病・多発糖尿病性合併症あり    | Pancreatic diabetes mellitus with multiple diabetic complications   | E137 | 8843380 |
| ステロイド糖尿病・多発糖尿病性合併症あり | Steroid diabetes mellitus with multiple diabetic complications      | E137 | 8843393 |
| 二次性糖尿病・多発糖尿病性合併症あり   | Secondary diabetes mellitus with multiple diabetic complications    | E137 | 8843453 |
| 薬剤性糖尿病・多発糖尿病性合併症あり   | Drug-induced diabetes mellitus with multiple diabetic complications | E137 | 8843624 |
| ウイルス性糖尿病・糖尿病性合併症なし   | Viral diabetes mellitus without diabetic complications              | E139 | 8843127 |
| 膵性糖尿病・糖尿病性合併症なし      | Pancreatic diabetes mellitus without diabetic complications         | E139 | 8843382 |
| ステロイド糖尿病・糖尿病性合併症なし   | Steroid diabetes mellitus without diabetic complications            | E139 | 8843395 |

|                  |                                                               |      |         |
|------------------|---------------------------------------------------------------|------|---------|
| 二次性糖尿病・糖尿病性合併症なし | Secondary diabetes mellitus without diabetic complications    | E139 | 8843455 |
| 薬剤性糖尿病・糖尿病性合併症なし | Drug-induced diabetes mellitus without diabetic complications | E139 | 8843626 |
| 糖尿病              | Diabetes mellitus                                             | E14  | 2500013 |
| 糖尿病合併症           | Diabetic complications                                        | E14  | 2507028 |
| 糖尿病性昏睡           | Diabetic coma                                                 | E140 | 2502006 |
| 糖尿病性低血糖性昏睡       | Hypoglycemic coma in the context of diabetes mellitus         | E140 | 8838076 |
| 糖尿病性アシドーシス       | Diabetic acidosis                                             | E141 | 2501002 |
| 糖尿病性アセトン血症       | Diabetic acetonemia                                           | E141 | 2501003 |
| 糖尿病性ケトアシドーシス     | Diabetic ketoacidosis                                         | E141 | 2501005 |
| 糖尿病性腎症           | Diabetic nephropathy                                          | E142 | 2503005 |
| 糖尿病性腎不全          | Diabetic renal failure                                        | E142 | 2503007 |
| 糖尿病性腎硬化症         | Diabetic nephrosclerosis                                      | E142 | 8838071 |
| 糖尿病性虹彩炎          | Diabetic iritis                                               | E143 | 2504004 |
| 糖尿病性中心性網膜症       | Diabetic central retinopathy                                  | E143 | 2504005 |
| 糖尿病性白内障          | Diabetic cataract                                             | E143 | 2504006 |
| 増殖性糖尿病性網膜症       | Proliferative diabetic retinopathy                            | E143 | 2504010 |
| 糖尿病黄斑症           | Diabetic maculopathy                                          | E143 | 2504012 |
| 糖尿病網膜症           | Diabetic retinopathy                                          | E143 | 2504013 |
| 糖尿病性眼筋麻痺         | Diabetic ophthalmoplegia                                      | E143 | 8838065 |
| 糖尿病黄斑浮腫          | Diabetic macular edema                                        | E143 | 8844089 |
| 糖尿病性神経痛          | Diabetic neuralgia                                            | E144 | 2505011 |
| 糖尿病性末梢神経障害       | Diabetic peripheral neuropathy                                | E144 | 2505018 |

|                 |                                      |      |         |
|-----------------|--------------------------------------|------|---------|
| 糖尿病性筋萎縮症        | Diabetic muscular atrophy            | E144 | 2505021 |
| 糖尿病性神経因性膀胱      | Diabetic neuropathic bladder         | E144 | 8838069 |
| 糖尿病性自律神経ニューロパチー | Diabetic autonomic neuropathy        | E144 | 8838070 |
| 糖尿病性多発ニューロパチー   | Diabetic polyneuropathy              | E144 | 8838074 |
| 糖尿病性単ニューロパチー    | Diabetic mononeuropathy              | E144 | 8838075 |
| 糖尿病性ニューロパチー     | Diabetic neuropathy                  | E144 | 8838078 |
| 糖尿病足病変          | Diabetic foot lesion                 | E144 | 8848634 |
| 糖尿病性神経障害性疼痛     | Diabetic neuropathic pain            | E144 | 8848768 |
| 糖尿病性壊疽          | Diabetic gangrene                    | E145 | 2506006 |
| 糖尿病性動脈閉塞症       | Diabetic arterial occlusion          | E145 | 2506011 |
| 糖尿病性潰瘍          | Diabetic ulcer                       | E145 | 8838063 |
| 糖尿病性血管障害        | Diabetic angiopathy                  | E145 | 8838066 |
| 糖尿病性動脈硬化症       | Diabetic arteriosclerosis            | E145 | 8838077 |
| 糖尿病性末梢血管症       | Diabetic peripheral vascular disease | E145 | 8838079 |
| 糖尿病性末梢血管障害      | Diabetic peripheral vascular disease | E145 | 8838080 |
| 糖尿病足壊疽          | Diabetic foot gangrene               | E145 | 8848632 |
| 糖尿病足潰瘍          | Diabetic foot ulcer                  | E145 | 8848633 |
| 糖尿病性関節症         | Diabetic arthropathy                 | E146 | 2507025 |
| 糖尿病性皮膚障害        | Diabetic skin disorders              | E146 | 2507029 |
| 糖尿病性肝障害         | Diabetic liver injury                | E146 | 8838064 |
| 糖尿病性高コレステロール血症  | Diabetic hypercholesterolemia        | E146 | 8838067 |
| 糖尿病性骨症          | Diabetic osteopathy                  | E146 | 8838068 |
| 糖尿病性精神障害        | Diabetic mental disorder             | E146 | 8838072 |
| 糖尿病性そう痒症        | Diabetic pruritus                    | E146 | 8838073 |

|               |                                                           |      |         |
|---------------|-----------------------------------------------------------|------|---------|
| 糖尿病性水疱        | Diabetic blister                                          | E146 | 8844652 |
| 糖尿病性浮腫性硬化症    | Diabetic edematous sclerosis                              | E146 | 8844653 |
| 高血糖高浸透圧症候群    | Hyperglycemia hyperosmolarity syndrome                    | E146 | 8845128 |
| 糖尿病・糖尿病性合併症なし | Diabetes mellitus without diabetic complications          | E149 | 8843439 |
| 非糖尿病性低血糖性昏睡   | Hypoglycemic coma not in the context of diabetes mellitus | E15  | 8839324 |
| 果糖尿症          | Levulosuria                                               | E741 | 8831401 |
| 本態性果糖尿症       | Essential levulosuria                                     | E741 | 8840104 |
| 良性果糖尿症        | Benign levulosuria                                        | E741 | 8841021 |
| 腎性糖尿          | Renal glycosuria                                          | E748 | 2714002 |
| 青銅性糖尿病        | Bronze diabetes mellitus                                  | E831 | 8835941 |
| 膵全摘後二次性糖尿病    | Secondary diabetes after pancreatectomy                   | E891 | 8835685 |
| 1型糖尿病合併妊娠     | Pregnancy with type 1 diabetes                            | O240 | 8830029 |
| 2型糖尿病合併妊娠     | Pregnancy with type 2 diabetes                            | O241 | 8830039 |
| 妊娠糖尿病         | Pregnancy diabetes mellitus                               | O244 | 6489003 |
| 妊娠中の糖尿病       | Overt diabetes in pregnancy                               | O249 | 8838621 |
| 妊娠中の耐糖能低下     | Impaired glucose tolerance in pregnancy                   | O998 | 8838619 |
| 妊娠糖尿病母体児症候群   | Gestational diabetes maternal syndrome                    | P700 | 8838633 |
| 糖尿病母体児        | Diabetes maternal infant                                  | P701 | 8838081 |
| 新生児一過性糖尿病     | Neonatal transient diabetes mellitus                      | P702 | 7751001 |
| 新生児糖尿病        | Neonatal diabetes mellitus                                | P702 | 7751002 |
| 新生児一過性高血糖症    | Neonatal transient hyperglycemia                          | P708 | 8844233 |
| 境界型糖尿病        | Borderline type diabetes mellitus                         | R730 | 2500031 |
| 耐糖能異常         | Impaired glucose tolerance                                | R730 | 2713009 |

---

|         |                             |      |         |
|---------|-----------------------------|------|---------|
| 化学的糖尿病  | Chemical diabetes mellitus  | R730 | 8831132 |
| 潜在性糖尿病  | Latent diabetes mellitus    | R730 | 8836104 |
| 前糖尿病    | Pre-diabetes mellitus       | R730 | 8836563 |
| 高血糖症    | Hyperglycemia               | R739 | 8833419 |
| 一過性糖尿   | Transient diabetes mellitus | R81  | 7915002 |
| 五炭糖尿症   | L-Xylulosuria               | R81  | 7915003 |
| 高血糖性糖尿  | Hypoglycemic glycosuria     | R81  | 8833420 |
| 食事性糖尿   | Dietary glycosuria          | R81  | 8834843 |
| 情動性糖尿   | Emotional glycosuria        | R81  | 8835464 |
| 正常血糖性糖尿 | Euglycemic glycosuria       | R81  | 8835871 |
| 糖尿      | Glycosuria                  | R81  | 8838062 |

---

**Supplementary Table S2** Codes of antidiabetic medications

| <b>Types of antidiabetic medication</b> | <b>Medicine codes</b>                                                                                                                                                                                                                                                                                                                                                                                                                                                                                                                                                                                                                                                                                                                                                                                                                                                                                                                                                                                                                                                                                                                                                                                                                                                                                                                                                                                                                                                                                                  |
|-----------------------------------------|------------------------------------------------------------------------------------------------------------------------------------------------------------------------------------------------------------------------------------------------------------------------------------------------------------------------------------------------------------------------------------------------------------------------------------------------------------------------------------------------------------------------------------------------------------------------------------------------------------------------------------------------------------------------------------------------------------------------------------------------------------------------------------------------------------------------------------------------------------------------------------------------------------------------------------------------------------------------------------------------------------------------------------------------------------------------------------------------------------------------------------------------------------------------------------------------------------------------------------------------------------------------------------------------------------------------------------------------------------------------------------------------------------------------------------------------------------------------------------------------------------------------|
| Sulfonylureas                           | 610412056, 610443002, 610443003, 613960002, 613960003, 613960008, 613960017, 613960026, 613960027, 613960028, 613960038, 613960039, 613960078, 620000048, 620002031, 620002032, 620003159, 620003160, 620003947, 620003948, 620006030, 620006890, 620009209, 620871601, 620872002, 620872003, 620872004, 620872009, 620872016, 620873202, 620873301, 620873402, 620873702, 621982701, 621997001, 621997101, 621998701, 621998801, 621998901, 621999001, 621999301, 621999401, 621999701, 621999801, 622000601, 622000701, 622001701, 622001801, 622004701, 622004801, 622005501, 622005601, 622005802, 622009802, 622009901, 622010001, 622011401, 622011501, 622011601, 622011701, 622013401, 622013501, 622013601, 622016001, 622016101, 622017301, 622017401, 622017501, 622017901, 622018001, 622018802, 622020903, 622021003, 622021801, 622021901, 622022001, 622022101, 622023501, 622023601, 622025201, 622025301, 622025801, 622025901, 622026501, 622026601, 622029901, 622030001, 622031401, 622031501, 622033001, 622033101, 622033201, 622033701, 622033801, 622035701, 622035801, 622036002, 622037901, 622038001, 622039901, 622048401, 622048501, 622058801, 622058901, 622059002, 622059102, 622075601, 622088301, 622088401, 622103201, 622114701, 622114801, 622118501, 622122201, 622122301, 622127301, 622127401, 622127501, 622128101, 622137701, 622141101, 622141302, 622143402, 622144001, 622159301, 622169102, 622169301, 622176301, 622177501, 622186201, 622187301, 622190001, 622190801, |



|                                  |                                                                                                                                                                                                                                                                                                                                                                                                                                                                                                                                                                                                                                                                                                                                                                                                                                                                                                                                                                                                                                                                                                           |
|----------------------------------|-----------------------------------------------------------------------------------------------------------------------------------------------------------------------------------------------------------------------------------------------------------------------------------------------------------------------------------------------------------------------------------------------------------------------------------------------------------------------------------------------------------------------------------------------------------------------------------------------------------------------------------------------------------------------------------------------------------------------------------------------------------------------------------------------------------------------------------------------------------------------------------------------------------------------------------------------------------------------------------------------------------------------------------------------------------------------------------------------------------|
|                                  | 622193301, 622194901, 622198001, 622202201, 622202801, 622205101, 622205501, 622208901, 622211501, 622217701, 622219701, 622221001, 622222001, 622242001, 622246801, 622252501, 622254701, 622271101, 622271201, 622271301, 622313200, 622313300, 622338501, 622338601, 622338701                                                                                                                                                                                                                                                                                                                                                                                                                                                                                                                                                                                                                                                                                                                                                                                                                         |
| Meglitinides                     | 622462501, 622462401, 620001908, 620001907, 622053601, 622040901, 622041001, 610432026, 610432027, 622196601, 622119301, 622230001, 622196701, 622119401, 622230101, 610432032, 610432033, 622518201, 622525401, 622515301, 622523401, 622521001, 622518101, 622525301, 622515201, 622523301, 622520901                                                                                                                                                                                                                                                                                                                                                                                                                                                                                                                                                                                                                                                                                                                                                                                                   |
| $\alpha$ -glucosidase inhibitors | 610406390, 620002841, 620002843, 620004045, 620004072, 620004071, 620008727, 620008726, 621665301, 621683401, 621673501, 621691201, 622090001, 621689303, 621689001, 621690402, 621690901, 621690203, 620002120, 620004069, 620005557, 620005558, 620005559, 620005560, 620005561, 620008071, 620008072, 620008073, 621953301, 621943301, 620009287, 621896502, 622008602, 620009286, 621896402, 622008502, 620009296, 620009294, 620009293, 622302301, 620009297, 621958801, 620005360, 621785002, 621942202, 620009295, 620009291, 620009289, 620009288, 622302201, 620009292, 621958701, 620005359, 621784902, 621942102, 620009290, 621937201, 621937101, 613960082, 613960081, 622053601, 622432501, 622426601, 622426701, 620003127, 620003128, 620003129, 620002121, 610406391, 621953401, 620004046, 620004070, 620005562, 620008074, 620005563, 620005564, 620005565, 620008075, 620005566, 621943401, 620008076, 620004073, 620002845, 621690303, 620008729, 620008728, 620004074, 621689403, 621689101, 621691001, 621691601, 621665401, 621683501, 620002847, 622090101, 621690502, 621673601 |
| Biguanides                       | 622517101, 622450401, 622450301, 620004480, 620004502, 620005979, 610463145, 621986401, 621986301, 610444147, 621974701, 622242501, 622070801, 621676001,                                                                                                                                                                                                                                                                                                                                                                                                                                                                                                                                                                                                                                                                                                                                                                                                                                                                                                                                                 |

|                                          |                                                                                                                                                                                                                                                                                                                                                                                                                                                                                                                                                                                                                                                                                                                                                                                                                                                                                                                                                                                                                                                    |
|------------------------------------------|----------------------------------------------------------------------------------------------------------------------------------------------------------------------------------------------------------------------------------------------------------------------------------------------------------------------------------------------------------------------------------------------------------------------------------------------------------------------------------------------------------------------------------------------------------------------------------------------------------------------------------------------------------------------------------------------------------------------------------------------------------------------------------------------------------------------------------------------------------------------------------------------------------------------------------------------------------------------------------------------------------------------------------------------------|
|                                          | 620005570, 622427201, 622421901, 622424401, 622421101, 622412701, 622438401, 622417101, 622432601, 622436301, 622427301, 622422001, 622424501, 622421201, 622448601, 622438501, 622417201, 622432701, 622466601                                                                                                                                                                                                                                                                                                                                                                                                                                                                                                                                                                                                                                                                                                                                                                                                                                    |
| Thiazolidinediones                       | 621990901, 621991001, 610432040, 610432041, 622048501, 622048401, 622065301, 622061601, 622041402, 622155901, 622063201, 622156901, 622144601, 622167201, 622045401, 622159401, 622056001, 622147501, 622175601, 622071901, 622065401, 622061701, 622041502, 622156001, 622063301, 622157001, 622144701, 622167301, 622045501, 622159501, 622056101, 622147601, 622175701, 622072001, 622320800, 622320900, 622065101, 622042901, 622061401, 622166801, 622182401, 622041202, 622079101, 622155701, 622063001, 622066201, 622164301, 622062302, 622047701, 622049901, 622046801, 622163301, 622053101, 622081801, 622059201, 622045201, 622053801, 622055801, 622147301, 622078301, 622175401, 622071701, 622065201, 622043001, 622061501, 622166901, 622182501, 622041302, 622079201, 622155801, 622063101, 622066301, 622164401, 622062402, 622047801, 622050001, 622046901, 622163401, 622053201, 622081901, 622059301, 622045301, 622061001, 622055901, 622147401, 622078401, 622175501, 622071801, 621986401, 621986301, 622086101, 622086001 |
| Dipeptidyl peptidase-4 inhibitors        | 621950901, 621951001, 621951101, 621970601, 621970701, 621970801, 621980701, 621986001, 621986101, 621986201, 622086001, 622086101, 622093501, 622182601, 622201701, 622245601, 622245701, 622277501, 622288401, 622415401, 622415501, 622448901, 622449001, 622450301, 622450401, 622517101                                                                                                                                                                                                                                                                                                                                                                                                                                                                                                                                                                                                                                                                                                                                                       |
| Sodium glucose cotransporter 2 inhibitor | 622340101, 622360601, 622401201, 622401301, 622306601, 622306701, 622336801, 622342001, 622341901, 622335701, 622335801                                                                                                                                                                                                                                                                                                                                                                                                                                                                                                                                                                                                                                                                                                                                                                                                                                                                                                                            |

|                                          |                                                                                                                                               |
|------------------------------------------|-----------------------------------------------------------------------------------------------------------------------------------------------|
| Rapid-acting insulin                     | 621911101, 621911301, 621911201, 620008895, 621926901, 622252701, 620008893, 620008894, 620008916, 640451027, 620007460                       |
| Short-acting insulin                     | 620008897, 620000265, 620008909, 620008907, 622114401                                                                                         |
| Long-acting insulin                      | 622440701, 620008945, 620008943, 620007536, 622198901, 622199001, 622410901, 622484801, 622411001, 621927001, 620008952, 620008953            |
| Immediate-acting insulin                 | 620000266, 620008912, 620008910, 622114501, 620002441, 620007459                                                                              |
| Premixed insulin                         | 620002439, 620007461, 620002440, 620007462, 620008915, 620008913, 622114601, 620000269, 620000448, 620008896, 621973201, 621973301, 640453023 |
| Combination-acting insulin               | 622451001, 622450901                                                                                                                          |
| Glucagon-like peptide-1 receptor agonist | 622038401, 622038301, 621974801, 622229001, 622406001, 622267001, 622442201                                                                   |

**Supplementary Table S3** Amputation codes

|                                                                           | <b>Medical procedure receipt codes (in Japan)</b> |
|---------------------------------------------------------------------------|---------------------------------------------------|
| Major LLA                                                                 |                                                   |
| above-knee/transfemoral amputation                                        | 150051610                                         |
| below-knee/transtibial amputation                                         | 150051710                                         |
| Hindquarter amputation/ Hip disarticulation                               | 150052210                                         |
| through-knee amputation                                                   | 150052310                                         |
| Minor LLA                                                                 |                                                   |
| Foot amputation, trans-metatarsal amputation,<br>Lisfranc disarticulation | 150051810                                         |
| Foot joint disarticulation                                                | 150052610                                         |
| Finger and toe amputation                                                 | 150051910                                         |
| Finger and toe joint disarticulation                                      | 150052710                                         |

**Supplementary Table S4** The population of Japanese national census (2015)

| <b>Age group, years</b> | <b>total</b> | <b>men</b> | <b>women</b> | <b>Age group, years</b> | <b>total</b> | <b>men</b> | <b>women</b> | <b>Age group, years</b> | <b>total</b> | <b>men</b> | <b>women</b> |
|-------------------------|--------------|------------|--------------|-------------------------|--------------|------------|--------------|-------------------------|--------------|------------|--------------|
| <b>0–4</b>              | 4,987,706    | 2,550,921  | 2,436,785    | <b>35–39</b>            | 8,316,157    | 4,204,202  | 4,111,955    | <b>70–74</b>            | 7,695,811    | 3,582,440  | 4,113,371    |
| <b>5–9</b>              | 5,299,787    | 2,714,591  | 2,585,196    | <b>40–44</b>            | 9,732,218    | 4,914,018  | 4,818,200    | <b>75–79</b>            | 6,276,856    | 2,787,417  | 3,489,439    |
| <b>10–14</b>            | 5,599,317    | 2,868,024  | 2,731,293    | <b>45–49</b>            | 8,662,804    | 4,354,877  | 4,307,927    | <b>80–84</b>            | 4,961,420    | 1,994,326  | 2,967,094    |
| <b>15–19</b>            | 6,008,388    | 3,085,416  | 2,922,972    | <b>50–54</b>            | 7,930,296    | 3,968,311  | 3,961,985    | <b>≥85</b>              | 4,887,487    | 1,461,624  | 3,425,863    |
| <b>20–24</b>            | 5,968,127    | 3,046,392  | 2,921,735    | <b>55–59</b>            | 7,515,246    | 3,729,523  | 3,785,723    | <b>Total</b>            | 127,094,745  | 61,841,738 | 65,253,007   |
| <b>25–29</b>            | 6,409,612    | 3,255,717  | 3,153,895    | <b>60–64</b>            | 8,455,010    | 4,151,119  | 4,303,891    |                         |              |            |              |
| <b>30–34</b>            | 7,290,878    | 3,684,747  |              | <b>60–65</b>            | 9,643,867    | 4,659,662  | 4,984,205    |                         |              |            |              |
